# Supplementary material for: Essential role of an ERV-derived Env38 protein in adaptive humoral immunity against an exogenous SVCV infection in a zebrafish model
Source: PLoS Pathog. 2023 Apr 4;19(4):e1011222. doi: 10.1371/journal.ppat.1011222 (PMC10072453; doi:10.1371/journal.ppat.1011222)
Supplement: S1 Data — (XLSX) [file ppat.1011222.s001.xlsx]

## Sheet: 5A
Well	Target	Sample	Cq		Target	Sample	Ctrl	Expression	Expression SEM	Corrected Expression SEM	Mean Cq	Cq SEM
A01	38	spleen	22.2245		38	brain		2431.08	72.9021	72.9021	20.73	0.15971
A02	38	spleen	23.7697		38	brain-pbs		271.281	58.4896	58.4896	21	0.28771
A03	38	spleen	22.6667		38	gill		376.217	70.8511	70.8511	20.6	0.01449
A04	38	kidney	15.002		38	gill-pbs		24.8817	4.19649	4.19649	22.81	0.13868
A05	38	kidney	14.2391		38	heart		2573.35	11.5561	112.556	20.55	0.35735
A06	38	kidney	13.7518		38	heart-pbs		278.602	10.0447	109.045	20.07	0.13788
A07	Actin	spleen	26.9315		38	intestin		309.682	78.7129	78.7129	21.22	0.17395
A08	Actin	spleen	27.5511		38	intestin-pbs		18.9541	52.5143	52.5143	19.89	2.24354
A09	Actin	spleen	27.5512		38	kidney		314.064	54.9572	543.957	14.33	0.36379
A10	Actin	kidney	14.8644		38	kidney-pbs		8.34998	1.81988	1.81988	24.74	0.17592
A11	Actin	kidney	18.5714		38	liver		453.745	68.8176	68.8176	22.48	0.17728
A12	Actin	kidney	23.4034		38	liver-pbs		214.677	68.4384	68.4384	20.98	0.18762
B01	38	brain-pbs	21.3718		38	skin		299.94	82.3055	82.3055	23.34	0.32084
B02	38	brain-pbs	20.4338		38	skin-pbs		30.788	10.1864	10.1864	25.54	0.10692
B03	38	brain-pbs	21.1945		38	spleen		281.528	98.3018	98.3018	22.89	0.45945
B04	38	kidney-pbs	24.4462		38	spleen-pbs	*	1	0.09342	0.09342	28.94	0.12779
B05	38	kidney-pbs	24.7329		Actin	brain		N/A	N/A	N/A	28.3	0.40136
B06	38	kidney-pbs	25.0553		Actin	brain-pbs		N/A	N/A	N/A	25.4	0.11821
B07	Actin	brain-pbs	25.3612		Actin	gill		N/A	N/A	N/A	25.48	0.27131
B08	Actin	brain-pbs	25.627		Actin	gill-pbs		N/A	N/A	N/A	23.77	0.19993
B09	Actin	brain-pbs	25.2243		Actin	heart		N/A	N/A	N/A	28.2	0.51736
B10	Actin	kidney-pbs	23.9946		Actin	heart-pbs		N/A	N/A	N/A	24.51	0.54758
B11	Actin	kidney-pbs	24.6299		Actin	intestin		N/A	N/A	N/A	25.82	0.32281
B12	Actin	kidney-pbs	23.7567		Actin	intestin-pbs		N/A	N/A	N/A	20.45	3.3081
C01	38	brain	20.9944		Actin	kidney		N/A	N/A	N/A	18.95	2.47211
C02	38	brain	20.4433		Actin	kidney-pbs		N/A	N/A	N/A	24.13	0.26062
C03	38	brain	20.7614		Actin	liver		N/A	N/A	N/A	27.63	0.12826
C04	38	intestin-pbs	22.7516		Actin	liver-pbs		N/A	N/A	N/A	25.04	0.41992
C05	38	intestin-pbs	15.4659		Actin	skin		N/A	N/A	N/A	27.89	0.23192
C06	38	intestin-pbs	21.4519		Actin	skin-pbs		N/A	N/A	N/A	26.8	0.46519
C07	Actin	brain	28.8726		Actin	spleen		N/A	N/A	N/A	27.34	0.20656
C08	Actin	brain	27.5271		Actin	spleen-pbs	*	N/A	N/A	N/A	25.26	0.04282
C09	Actin	brain	28.5031
C10	Actin	intestin-pbs	13.873
C11	Actin	intestin-pbs	24.3296
C12	Actin	intestin-pbs	23.1616
D01	38	spleen-pbs	28.6902
D02	38	spleen-pbs	29.11
D03	38	spleen-pbs	29.0217
D04	38	gill-pbs	22.8447
D05	38	gill-pbs	22.5564
D06	38	gill-pbs	23.0334
D07	Actin	spleen-pbs	25.267
D08	Actin	spleen-pbs	25.1842
D09	Actin	spleen-pbs	25.3321
D10	Actin	gill-pbs	23.3997
D11	Actin	gill-pbs	23.8209
D12	Actin	gill-pbs	24.0865
E01	38	heart	21.1139
E02	38	heart	19.8863
E03	38	heart	20.6381
E04	38	heart-pbs	19.9147
E05	38	heart-pbs	19.9539
E06	38	heart-pbs	20.3465
E07	Actin	heart	28.7843
E08	Actin	heart	27.1647
E09	Actin	heart	28.639
E10	Actin	heart-pbs	25.6083
E11	Actin	heart-pbs	24.0102
E12	Actin	heart-pbs	23.9243
F01	38	liver	22.209
F02	38	liver	22.8154
F03	38	liver	22.4283
F04	38	liver-pbs	20.6185
F05	38	liver-pbs	21.0593
F06	38	liver-pbs	21.2525
F07	Actin	liver	27.8719
F08	Actin	liver	27.4347
F09	Actin	liver	27.5848
F10	Actin	liver-pbs	24.2085
F11	Actin	liver-pbs	25.3806
F12	Actin	liver-pbs	25.5407
G01	38	skin	23.3079
G02	38	skin	22.8008
G03	38	skin	23.9109
G04	38	gill	20.5757
G05	38	gill	20.6103
G06	38	gill	20.6244
G07	Actin	skin	28.1345
G08	Actin	skin	27.4253
G09	Actin	skin	28.1069
G10	Actin	gill	25.6098
G11	Actin	gill	25.8704
G12	Actin	gill	24.9581
H01	38	skin-pbs	25.5772
H02	38	skin-pbs	25.3354
H03	38	skin-pbs	25.6993
H04	38	intestin	21.3561
H05	38	intestin	20.8752
H06	38	intestin	21.4301
H07	Actin	skin-pbs	26.3417
H08	Actin	skin-pbs	26.3321
H09	Actin	skin-pbs	27.7325
H10	Actin	intestin	26.1196
H11	Actin	intestin	25.1704
H12	Actin	intestin	26.1569

## Sheet: 6A
Days	PBS			ScrambledsiRNA-LV			38EnvsiRNA-LV			SVCV			SVCV+anti-DrEnv38			SVCV+IgG
1	100	100	100	100	100	100	100	100	100	100	100	100	100	100	100	100	100	100
2	100	100	100	93.3	93.3	96.7	90	86.7	93.3	96.7	93.3	96.7	96.7	93.3	96.7	93.3	96.7	93.3
3	100	100	100	86.7	86	96.7	83.3	86.7	86.7	86.7	86.7	93.3	83.3	83.3	86.7	83.3	86.7	86.7
4	96.7	100	100	86	86	83.3	63.3	76.7	73.3	76.7	73.3	83.3	73.3	73.3	73.3	73.3	83.3	83.3
5	96.7	100	100	83.3	86	83.3	53.3	70	70	73.3	72.3	72.3	56.7	56.7	56.7	70	73.3	76.7
6	96.7	100	100	76.7	83.3	83.3	46.7	66.7	63.3	72.3	70	66.7	46.7	46.7	50	66.7	73.3	73.3
7	96.7	100	100	66.7	66.7	76.7	40	53.3	53.3	70	63.3	66.7	36.7	36.7	36.7	63.3	66.7	66.7
8	96.7	100	100	60	66.7	76.7	36.7	40	33.3	63.3	53.3	63.3	26.7	26.7	26.7	63.3	63.3	66.7
9	96.7	100	100	53.3	53.3	72.3	30	30	33.3	56.7	53.3	53.3	26.7	26.7	26.7	60	60	63.3
10	96.7	100	100	50	53.3	63.3	26.7	30	33.3	50	50	53.3	23.3	23.3	23.3	56.7	60	63.3
11	96.7	100	100	50	53.3	63.3	26.7	30	33.3	50	50	53.3	20	20	20	56.7	56.7	63.3
12	96.7	100	100	50	53.3	53.3	26.7	30	33.3	50	50	50	20	16.7	16.7	56.7	56.7	60
13	96.7	100	100	50	53.3	50	26.7	30	33.3	46.7	46.7	50	20	16.7	16.7	53.3	56.7	60
14	96.7	100	100	46.7	53.3	50	26.7	30	33.3	43.3	46.7	50	20	16.7	16.7	53.3	53.3	56.7
15	96.7	100	100	46.7	50	50	26.7	30	33.3	43.3	46.7	50	20	16.7	16.7	50	53.3	56.7
16	96.7	100	100	46.7	50	46.7	26.7	30	33.3	43.3	46.7	50	20	16.7	16.7	50	53.3	56.7
17	96.7	100	100	46.7	50	46.7	26.7	30	33.3	43.3	46.7	50	20	16.7	16.7	50	53.3	56.7
18	96.7	100	100	46.7	50	46.7	26.7	30	33.3	43.3	46.7	50	20	16.7	16.7	50	53.3	56.7
19	96.7	100	100	46.7	50	46.7	26.7	30	33.3	43.3	46.7	50	20	16.7	16.7	50	53.3	56.7
20	96.7	100	100	46.7	50	46.7	26.7	30	33.3	43.3	46.7	50	20	16.7	16.7	50	53.3	56.7
21	96.7	100	100	46.7	50	46.7	26.7	30	33.3	43.3	46.7	50	20	16.7	16.7	50	53.3	56.7
22	96.7	100	100	46.7	50	46.7	26.7	30	33.3	43.3	46.7	50	20	16.7	16.7	50	53.3	56.7
23	96.7	100	100	46.7	50	46.7	26.7	30	33.3	43.3	46.7	50	20	16.7	16.7	50	53.3	56.7
24	96.7	100	100	46.7	50	46.7	26.7	30	33.3	43.3	46.7	50	20	16.7	16.7	50	53.3	56.7
25	96.7	100	100	46.7	50	46.7	26.7	30	33.3	43.3	46.7	50	20	16.7	16.7	50	53.3	56.7
26	96.7	100	100	46.7	50	46.7	26.7	30	33.3	43.3	46.7	50	20	16.7	16.7	50	53.3	56.7
27	96.7	100	100	46.7	50	46.7	26.7	30	33.3	43.3	46.7	50	20	16.7	16.7	50	53.3	56.7
28	96.7	100	100	46.7	50	46.7	26.7	30	33.3	43.3	46.7	50	20	16.7	16.7	50	53.3	56.7
29	96.7	100	100	46.7	50	46.7	26.7	30	33.3	43.3	46.7	50	20	16.7	16.7	50	53.3	56.7
30	96.7	100	100	46.7	50	46.7	26.7	30	33.3	43.3	46.7	50	20	16.7	16.7	50	53.3	56.7
survival rate	96.7			46.7			26.7			43.3			20			50
	100			50			30			46.7			16.7			53.3
	100			46.7			33.3			50			16.7			56.7
mean	98.9			47.8			30			46.6667			17.8			53.3333
std deviation	1.55563			1.55563			2.69444			2.73537			1.55563			2.73537
sem	0.898146			0.898146			1.55563			1.57926			0.898146			1.57926

## Sheet: 6B
OD450
		PBS	SVCV	SVCV+DrEnv38siRNA-LV	SVCV+ScrambledsiRNA-LV	SVCV+anti-DrEnv38	SVCV+IgG
	7	0.142	0.425	0.289	0.59	0.328	0.42
		0.159	0.396	0.276	0.641	0.307	0.449
		0.202	0.422	0.303	0.601	0.301	0.444
	14	0.208	0.653	0.444	0.895	0.522	0.673
		0.205	0.658	0.493	0.866	0.517	0.671
		0.162	0.641	0.443	0.888	0.473	0.712
	21	0.264	0.859	0.54	1.272	0.426	1.061
		0.272	0.915	0.549	1.232	0.608	1.07
		0.281	0.984	0.551	1.306	0.601	1.134
	blank	0.051	0.048	0.054
OD450sample-OD450blank
	7			14			21
PBS	0.091	0.108	0.151	0.157	0.154	0.111	0.213	0.221	0.23
SVCV	0.374	0.345	0.371	0.602	0.607	0.59	0.808	0.864	0.933
SVCV+anti-DrEnv38	0.277	0.256	0.25	0.471	0.466	0.422	0.375	0.557	0.55
SVCV+IgG	0.369	0.398	0.393	0.622	0.62	0.661	1.01	1.019	1.083
SVCV+DrEnv38siRNA-LV	0.238	0.225	0.252	0.393	0.442	0.392	0.489	0.498	0.5
SVCV+ScrambledsiRNA-LV	0.539	0.59	0.55	0.844	0.815	0.837	1.221	1.181	1.255

## Sheet: 7B
Target	Sample	Cq		Target	Sample	Ctrl	Expression	Expression SEM	Corrected Expression SEM	Mean Cq	Cq SEM
CD154	anti	19.4688		Actin	anti		N/A	N/A	N/A	18.87	0.57564
lck	anti	25.6308		Actin	control	*	N/A	N/A	N/A	19.99	0.18311
Actin	anti	18.291		Actin	IgG		N/A	N/A	N/A	18.16	0.65471
CD154	anti	19.9696		CD154	anti		10.5774	4.60237	4.60237	19.72	0.25038
lck	anti	26.6371		CD154	control	*	1	0.38009	0.38009	24.25	0.51687
Actin	anti	19.4422		CD154	IgG		37.341	6.94583	6.94583	17.19	0.0022
CD154	anti	19.9794		lck	anti		5.91151	3.13277	3.13277	26.13	0.50316
lck	anti	25.736		lck	control	*	1	0.14497	0.14497	29.82	0.10105
Actin	anti	20.0096		lck	IgG		33.489	15.2236	15.2236	22.93	0.03823
CD154	IgG	20.961
lck	IgG	26.1107
Actin	IgG	20.0706
CD154	IgG	17.1966
lck	IgG	22.8886
Actin	IgG	17.5069
CD154	IgG	17.1922
lck	IgG	22.9651
Actin	IgG	18.8163
CD154	control	23.73
lck	control	29.9233
Actin	control	19.8082
CD154	control	24.7637
lck	control	29.7212
Actin	control	20.1744

## Sheet: 7D
Target	Sample	Cq		Target	Sample	Ctrl	Expression	Expression SEM	Corrected Expression SEM	Mean Cq	Cq SEM
Actin	PBS	18.4068		Actin	38siRNA		N/A	N/A	N/A	18.93	0.17125
Actin	PBS	20.2488		Actin	anti-38		N/A	N/A	N/A	19.76	0.02444
Actin	PBS	19.453		Actin	IgG		N/A	N/A	N/A	16.52	0.0826
CD154	PBS	29.6377		Actin	PBS	*	N/A	N/A	N/A	19.37	0.53337
CD154	PBS	29.57		Actin	Src		N/A	N/A	N/A	16.71	0.06753
CD154	PBS	29.6853		Actin	SVCV		N/A	N/A	N/A	17.24	0.28449
lck	PBS	28.5797		CD154	38siRNA		1.06436	0.27284	0.27284	29.1	0.32779
lck	PBS	28.5434		CD154	anti-38		2.28009	0.10115	0.10115	28.83	0.05915
lck	PBS	28.8996		CD154	IgG		3.49055	0.21612	0.21612	24.98	0.03401
Actin	SVCV	17.5687		CD154	PBS	*	1	0.37043	0.37043	29.63	0.03343
Actin	SVCV	17.472		CD154	Src		2.38606	0.22746	0.22746	25.72	0.11981
Actin	SVCV	16.671		CD154	SVCV		3.08439	0.61119	0.61119	25.87	0.0281
CD154	SVCV	25.9286		lck	38siRNA		1.51007	0.27918	0.27918	27.64	0.20449
CD154	SVCV	25.8567		lck	anti-38		2.43751	0.08624	0.08624	27.78	0.04481
CD154	SVCV	25.8359		lck	IgG		5.07866	0.94894	0.94894	23.48	0.2566
lck	SVCV	23.7613		lck	PBS	*	1	0.37793	0.37793	28.67	0.11316
lck	SVCV	23.6477		lck	Src		5.00537	0.85262	0.85262	23.69	0.23629
lck	SVCV	23.6094		lck	SVCV		7.30631	1.45916	1.45916	23.67	0.0456
Actin	IgG	16.5137
Actin	IgG	16.6718
Actin	IgG	16.3862
CD154	IgG	25.0498
CD154	IgG	24.9524
CD154	IgG	24.9436
lck	IgG	23.1893
lck	IgG	23.9954
lck	IgG	23.2679
Actin	Src	16.7906
Actin	Src	16.7658
Actin	Src	16.5768
CD154	Src	25.6839
CD154	Src	25.9403
CD154	Src	25.5295
lck	Src	24.1648
lck	Src	23.4639
lck	Src	23.4482
Actin	anti-38	19.7127
Actin	anti-38	19.7601
Actin	anti-38	19.7972
CD154	anti-38	28.8446
CD154	anti-38	28.7197
CD154	anti-38	28.9228
lck	anti-38	27.7997
lck	anti-38	27.8389
lck	anti-38	27.6892
Actin	38siRNA	19.1693
Actin	38siRNA	19.0155
Actin	38siRNA	18.5962
CD154	38siRNA	29.6814
CD154	38siRNA	29.0668
CD154	38siRNA	28.5472
lck	38siRNA	27.3682
lck	38siRNA	27.5046
lck	38siRNA	28.0384

## Sheet: 8B&8E
Target	Sample	Cq		Target	Sample	Ctrl	Expression	Expression SEM	Corrected Expression SEM	Mean Cq	Cq SEM
Actin	PBS	18.4068		Actin	38siRNA		N/A	N/A	N/A	18.93	0.17125
Actin	PBS	20.2488		Actin	anti-38		N/A	N/A	N/A	19.76	0.02444
Actin	PBS	19.453		Actin	IgG		N/A	N/A	N/A	16.52	0.0826
CD40	PBS	28.5797		Actin	PBS	*	N/A	N/A	N/A	19.37	0.53337
CD40	PBS	28.5434		Actin	Src		N/A	N/A	N/A	16.71	0.06753
CD40	PBS	28.8996		Actin	SVCV		N/A	N/A	N/A	17.24	0.28449
Actin	SVCV	17.5687		CD40	38siRNA		1.51007	0.27918	0.27918	27.64	0.20449
Actin	SVCV	17.472		CD40	anti-38		2.43751	0.08624	0.08624	27.78	0.04481
Actin	SVCV	16.671		CD40	IgG		5.07866	0.94894	0.94894	23.48	0.2566
CD40	SVCV	23.7613		CD40	PBS	*	1	0.37793	0.37793	28.67	0.11316
CD40	SVCV	23.6477		CD40	Src		5.00537	0.85262	0.85262	23.69	0.23629
CD40	SVCV	23.6094		CD40	SVCV		7.30631	1.45916	1.45916	23.67	0.0456
Actin	IgG	16.5137
Actin	IgG	16.6718
Actin	IgG	16.3862
CD40	IgG	23.1893
CD40	IgG	23.9954
CD40	IgG	23.2679
Actin	Src	16.7906
Actin	Src	16.7658
Actin	Src	16.5768
CD40	Src	24.1648
CD40	Src	23.4639
CD40	Src	23.4482
Actin	anti-38	19.7127
Actin	anti-38	19.7601
Actin	anti-38	19.7972
CD40	anti-38	27.7997
CD40	anti-38	27.8389
CD40	anti-38	27.6892
Actin	38siRNA	19.1693
Actin	38siRNA	19.0155
Actin	38siRNA	18.5962
CD40	38siRNA	27.3682
CD40	38siRNA	27.5046
CD40	38siRNA	28.0384
Target	Sample	Cq		Target	Sample	Ctrl	Expression	Expression SEM	Corrected Expression SEM	Mean Cq	Cq SEM
mIgM	38EnvsiRNA	31.1189		Actin	38EnvsiRNA		N/A	N/A	N/A	34.5	0.34017
mIgM	38EnvsiRNA	30.707		Actin	anti-38Env		N/A	N/A	N/A	31.55	0.11585
mIgM	38EnvsiRNA	31.539		Actin	control		N/A	N/A	N/A	27.65	0.17469
IgZ	38EnvsiRNA	35.2621		Actin	IgG		N/A	N/A	N/A	34.54	0.1383
IgZ	38EnvsiRNA	36.2784		Actin	ScrambledsiRNA		N/A	N/A	N/A	34.35	0.63229
IgZ	38EnvsiRNA	34.7766		Actin	SVCV		N/A	N/A	N/A	34.68	0.6532
Actin	38EnvsiRNA	35.072		IgZ	38EnvsiRNA		10.7477	4.15786	4.15786	35.44	0.44247
Actin	38EnvsiRNA	34.5304		IgZ	anti-38Env		7.01278	2.92551	2.92551	33.11	0.59437
Actin	38EnvsiRNA	33.8949		IgZ	control		1	0.35835	0.35835	32.01	0.49693
mIgM	IgG	29.2817		IgZ	IgG		66.2352	3.8117	3.8117	34.89	0.31934
mIgM	IgG	29.0432		IgZ	ScrambledsiRNA		64.6977	9.89574	9.89574	34.09	0.26003
mIgM	IgG	29.5566		IgZ	SVCV		74.1056	18.069	18.069	32.84	0.51462
IgZ	IgG	34.2476		mIgM	38EnvsiRNA		1.14292	0.3299	0.3299	31.12	0.24019
IgZ	IgG	35.2286		mIgM	anti-38Env		2.77455	0.22677	0.22677	26.9	0.0704
IgZ	IgG	35.1808		mIgM	control		1	0.11574	0.11574	24.46	0.08684
Actin	IgG	34.4026		mIgM	IgG		7.17639	0.53969	0.53969	29.29	0.14834
Actin	IgG	34.6792		mIgM	ScrambledsiRNA		9.65247	3.67432	3.67432	27.9	0.18727
Actin	IgG	NaN		mIgM	SVCV		9.90984	1.69353	1.69353	28.19	0.06848
mIgM	control	24.3675
mIgM	control	24.3857
mIgM	control	24.6367
IgZ	control	32.7495
IgZ	control	31.0673
IgZ	control	32.225
Actin	control	27.4734
Actin	control	27.8228
Actin	control	NaN
mIgM	anti-38Env	26.8657
mIgM	anti-38Env	26.7923
mIgM	anti-38Env	27.0304
IgZ	anti-38Env	33.1
IgZ	anti-38Env	34.143
IgZ	anti-38Env	32.0842
Actin	anti-38Env	31.669
Actin	anti-38Env	31.4373
Actin	anti-38Env	NaN
mIgM	ScrambledsiRNA	27.7529
mIgM	ScrambledsiRNA	27.6673
mIgM	ScrambledsiRNA	28.267
IgZ	ScrambledsiRNA	34.064
IgZ	ScrambledsiRNA	33.6546
IgZ	ScrambledsiRNA	34.5542
Actin	ScrambledsiRNA	34.9837
Actin	ScrambledsiRNA	33.7191
Actin	ScrambledsiRNA	NaN
mIgM	SVCV	28.0596
mIgM	SVCV	28.2918
mIgM	SVCV	28.2175
IgZ	SVCV	32.0041
IgZ	SVCV	33.7773
IgZ	SVCV	32.7315
Actin	SVCV	35.3365
Actin	SVCV	34.0301
Actin	SVCV	NaN

## Sheet: 8F
		SVCV			anti-38Env			PBS			negative					SVCV		anti-38Env		PBS		negative			sample/negative					SVCV		anti-38Env		PBS		negative			sample/negative				SVCV		anti-38Env		PBS		negative
		1	2	3	4	5	6	4	5	6	7	8	9			1.574	100	1.516	100	0.974	100	0.234	100		6.7265	6.47863	4.16239			1.19	100	1.488	100	0.955	100	0.26	100		4.57692	5.72308	3.67308		1.64	100	1.604	100	1.009	100	0.26
100	A	1.638	1.244	1.698	1.568	1.539	1.657	1.022	1.004	1.056	0.281	0.31	0.31	450
		0.064	0.054	0.058	0.052	0.051	0.053	0.048	0.049	0.047	0.047	0.05	0.05	630		1.026	200	0.202	200	0.356	200	0.114	200		9	1.77193	3.12281			1.459	200	0.228	200	0.351	200	0.094	200		15.5213	2.42553	3.73404		1.315	200	0.263	200	0.379	200	0.129
200	B	1.097	1.524	1.373	0.258	0.281	0.314	0.405	0.398	0.424	0.165	0.148	0.182	450
		0.071	0.065	0.058	0.056	0.053	0.051	0.049	0.047	0.045	0.051	0.054	0.053	630		0.343	400	0.128	400	0.067	400	0.028	400		12.25	4.57143	2.39286			0.306	400	0.121	400	0.07	400	0.021	400		14.5714	5.7619	3.33333		0.352	400	0.074	400	0.066	400	0.024
400	C	0.394	0.354	0.41	0.184	0.172	0.123	0.115	0.118	0.115	0.078	0.072	0.074	450
		0.051	0.048	0.058	0.056	0.051	0.049	0.048	0.048	0.049	0.05	0.051	0.05	630		0.176	600	0.069	600	0.038	600	0.022	600		8	3.13636	1.72727			0.189	600	0.074	600	0.037	600	0.026	600		7.26923	2.84615	1.42308		0.184	600	0.131	600	0.039	600	0.025
600	D	0.235	0.246	0.275	0.12	0.135	0.183	0.09	0.084	0.087	0.073	0.093	0.077	450
		0.059	0.057	0.091	0.051	0.061	0.052	0.052	0.047	0.048	0.051	0.067	0.052	630		0.25	800	0.025	800	0.022	800	0.023	800		10.8696	1.08696	0.956522			0.296	800	0.027	800	0.022	800	0.023	800		12.8696	1.17391	0.956522		0.247	800	0.025	800	0.022	800	0.025
800	E	0.302	0.354	0.307	0.078	0.078	0.08	0.07	0.07	0.07	0.076	0.078	0.08	450
		0.052	0.058	0.06	0.053	0.051	0.055	0.048	0.048	0.048	0.053	0.055	0.055	630		0.118	1000	0.025	1000	0.023	1000	0.024	1000		4.91667	1.04167	0.958333			0.127	1000	0.026	1000	0.024	1000	0.025	1000		5.08	1.04	0.96		0.127	1000	0.024	1000	0.024	1000	0.026
1000	F	0.171	0.18	0.187	0.077	0.076	0.073	0.07	0.076	0.07	0.075	0.088	0.077	450
		0.053	0.053	0.06	0.052	0.05	0.049	0.047	0.052	0.046	0.051	0.063	0.051	630		0.085	1200	0.023	1200	0.021	1200	0.029	1200		2.93103	0.793103	0.724138			0.078	1200	0.025	1200	0.022	1200	0.024	1200		3.25	1.04167	0.916667		0.078	1200	0.025	1200	0.023	1200	0.023
1200	G	0.147	0.128	0.135	0.073	0.076	0.084	0.066	0.067	0.068	0.078	0.075	0.08	450
		0.062	0.05	0.057	0.05	0.051	0.059	0.045	0.045	0.045	0.049	0.051	0.057	630		0.031	1400	0.024	1400	0.022	1400	0.023	1400		1.34783	1.04348	0.956522			0.024	1400	0.025	1400	0.022	1400	0.024	1400		1	1.04167	0.916667		0.024	1400	0.025	1400	0.023	1400	0.025
1400	H	0.104	0.075	0.076	0.072	0.075	0.078	0.07	0.068	0.068	0.073	0.08	0.073	450
		0.073	0.051	0.052	0.048	0.05	0.053	0.048	0.046	0.045	0.05	0.056	0.048	630
																SVCV	0.085	1050					PBS	0.067	505					SVCV	0.078	1031					PBS	0.07	494				SVCV	0.078	1045				PBS
	SVCV			anti-38Env			PBS			negative						anti-38Env	0.069	556					negative							anti-38Env	0.074	549											anti-38Env	0.131	397
450-630	1.574	1.19	1.64	1.516	1.488	1.604	0.974	0.955	1.009	0.234	0.26	0.26
450-630	1.026	1.459	1.315	0.202	0.228	0.263	0.356	0.351	0.379	0.114	0.094	0.129
450-630	0.343	0.306	0.352	0.128	0.121	0.074	0.067	0.07	0.066	0.028	0.021	0.024
450-630	0.176	0.189	0.184	0.069	0.074	0.131	0.038	0.037	0.039	0.022	0.026	0.025
450-630	0.25	0.296	0.247	0.025	0.027	0.025	0.022	0.022	0.022	0.023	0.023	0.025
450-630	0.118	0.127	0.127	0.025	0.026	0.024	0.023	0.024	0.024	0.024	0.025	0.026
450-630	0.085	0.078	0.078	0.023	0.025	0.025	0.021	0.022	0.023	0.029	0.024	0.023
450-630	0.031	0.024	0.024	0.024	0.025	0.025	0.022	0.022	0.023	0.023	0.024	0.025
[truncated: 4 more columns]

## Sheet: 9A
Days	UC			IC			IK			UK
1	100	100	100	100	100	100	100	100	100	100	100	100
2	90	93	90	97	97	97	93	93	93	80	83	80
3	83	83	90	90	90	97	80	83	80	67	83	77
4	67	67	83	83	83	90	77	80	80	60	77	77
5	60	67	77	77	83	83	67	77	77	53	60	53
6	50	60	60	67	77	77	53	53	53	50	53	50
7	40	50	50	67	67	77	50	53	53	27	27	27
8	33	40	40	67	67	77	50	53	53	20	20	27
9	33	40	40	67	67	77	50	53	53	20	20	27
10	33	40	40	67	67	77	50	53	53	20	20	27
survival rate	33			67			50			20
	40			67			53			20
	40			77			53			27
mean	37.6667			70.3333			52			22.3333
std deviation	3.29983			4.71405			1.41421			3.29983
sem	1.90516			2.72166			0.816497			1.90516

## Sheet: 9B
	log10
	Unimmunized KO	Unimmunized WT	Immunized KO	Immunized WT
1	7.558	8.372	7.167	5.661
2	9.743	8.926	5.595	4.558
3	9.925	7.173	6.559	5.97
mean	9.07533	8.157	6.44033	5.39633
std deviation	1.07549	0.731629	0.647229	0.606065
sem	0.620932	0.422406	0.373678	0.349912

## Sheet: 9E
Well	Target	Sample	Cq		Target	Sample	Ctrl	Expression	Expression SEM	Corrected Expression SEM	Mean Cq	Cq SEM
A03	Actin	KO	25.16
A04	Actin	KO	25.257
A05	Actin	WT	25.4295		Actin	KO	*	N/A	N/A	N/A	25.21	0.04848
A06	Actin	WT	26.051		Actin	WT		N/A	N/A	N/A	25.74	0.31073
A09	LCK	KO	20.7487		CD154	KO	*	1	0.04316	0.04316	22.72	0.03908
A10	LCK	KO	20.7776		CD154	WT		3.22974	0.29695	0.29695	21.56	0.01917
A11	LCK	WT	19.3493		CD40	KO	*	1	0.03528	0.03528	27.9	0.01549
A12	LCK	WT	19.3401		CD40	WT		4.46372	0.98687	0.98687	26.28	0.07198
F09	IgM	KO	25.6579		IgM	KO	*	1	0.04172	0.04172	25.62	0.03567
F10	IgM	KO	25.5866		IgM	WT		6.1536	0.40821	0.40821	23.53	0.11156
F11	IgM	WT	23.421		LCK	KO	*	1	0.03506	0.03506	20.76	0.01445
F12	IgM	WT	23.6441		LCK	WT		3.86433	0.1324	0.1324	19.34	0.00461
G03	CD154	KO	22.7621
G04	CD154	KO	22.684
G05	CD154	WT	21.5826
G06	CD154	WT	21.5442

[truncated: 7 more sheets: 10K, 12C, 12E, S3A, S3D, S3G, S7]
